# Supplementary material for: Fecal microbiota transplantation from warthog to pig confirms the influence of the gut microbiota on African swine fever susceptibility
Source: PubMed Central journal article supplement (PMC7573625; doi:10.1038/s41598-020-74651-3), 2020-10-19
Supplement: 41598_2020_74651_MOESM1_ESM.pdf [file 41598_2020_74651_MOESM1_ESM.pdf]

**Fecal microbiota transplantation from warthog to pig confirms the influence of the gut microbiota on African swine fever susceptibility**

Jinya Zhang<sup>1</sup>, Fernando Rodríguez<sup>1,\*</sup>, Maria Jesus Navas<sup>1</sup>, Mar Costa-Hurtado<sup>1</sup>, Vanessa<sup>3</sup> Almagro, Laia Bosch-Camós<sup>1</sup>, Elisabeth López<sup>1</sup>, Raul Cuadrado<sup>1</sup>, Francesc Accensi<sup>1,2</sup>, Sonia Pina-Pedrero<sup>1</sup>, Jorge Martínez<sup>1,2,@</sup>, Florencia Correa-Fiz<sup>1,@,\*</sup>

<sup>1</sup>IRTA, Centre de Recerca en Sanitat Animal (CReSA, IRTA), Campus de la Universitat Autònoma de Barcelona, 08193 Bellaterra, Spain.

<sup>2</sup>Departament de Sanitat i Anatomia Animals, Universitat Autònoma de Barcelona. 08193, Bellaterra, Barcelona, Spain

<sup>3</sup>Veterinary service Zoo Barcelona, Parc Ciudadella s/n 08003, Barcelona, Spain.

**Supplementary Table S1.** Number of sequences per sample obtained after filtering used for this study.

| Sample ID (#animal_dpft) | Sequence Count |
|--------------------------|----------------|
| 13D15                    | 1,425          |
| 1D15                     | 39,774         |
| 3D15                     | 34,841         |
| 4D15                     | 11,643         |
| 6D15                     | 48,778         |
| 9D15                     | 62,010         |
| 16D15                    | 44,153         |
| 18D15                    | 51,097         |
| 22D15                    | 55,039         |
| 24D15                    | 23,711         |
| 25D15                    | 26,415         |
| 28D15                    | 30,556         |
| 29D15                    | 43,867         |
| 30D15                    | 36,541         |
| 36D15                    | 27,450         |
| 37D15                    | 23,849         |
| 41D15                    | 53,813         |
| 43D15                    | 67,027         |
| 44D15                    | 29,913         |
| 46D15                    | 19,050         |

| Sample ID (pools) | Sequence Count |
|-------------------|----------------|
| pWF               | 81,614         |
| pPF               | 53,689         |

| Sample ID (#animal_dpft) | Sequence Count |
|--------------------------|----------------|
| 13D0                     | 47,310         |
| 16D0                     | 50,364         |
| 18D0                     | 24,635         |
| 22D0                     | 39,719         |
| 24D0                     | 45,343         |
| 37D0                     | 38,801         |
| 41D0                     | 46,035         |
| 43D0                     | 43,323         |
| 44D0                     | 30,032         |
| 46D0                     | 38,076         |

**Supplementary Table S1.** Number of sequences per sample obtained after filtering used for this study (cont.).

| <b>Sample ID (#animal_dpft)</b> | <b>Sequence Count</b> |
|---------------------------------|-----------------------|
| 13D8                            | 25,989                |
| 16D8                            | 44,081                |
| 18D8                            | 32,428                |
| 22D8                            | 40,595                |
| 24D8                            | 15,640                |
| 37D8                            | 19,232                |
| 41D8                            | 38168                 |
| 43D8                            | 16,850                |
| 44D8                            | 10,054                |
| 46D8                            | 26,878                |

Supplementary Table S2. Relative abundance (%) of taxa assigned at different levels (Phyla, Family and Genera) for each animal sample and mean relative abundance (%) for each group of animals.

| Kingdom  | Phyla               | PF_15.dppt |        |        |        |         |        |        | WF_15.dppt |        |        |         |        |        |        | AMF_15.dppt |        |         |        |        |        |        | PBS_15.dppt |         |  |  |  |  |  |
|----------|---------------------|------------|--------|--------|--------|---------|--------|--------|------------|--------|--------|---------|--------|--------|--------|-------------|--------|---------|--------|--------|--------|--------|-------------|---------|--|--|--|--|--|
|          |                     | 16         | 18     | 22     | 24     | AVERAGE | 25     | 28     | 29         | 30     | 36     | AVERAGE | 37     | 41     | 43     | 44          | 46     | AVERAGE | 1      | 3      | 4      | 9      | 11          | AVERAGE |  |  |  |  |  |
| Bacteria | Actinobacteria      | 0.000      | 0.149  | 0.220  | 0.169  | 0.134   | 0.000  | 0.000  | 0.217      | 0.000  | 0.204  | 0.084   | 0.117  | 0.000  | 0.179  | 0.057       | 0.037  | 0.078   | 0.000  | 0.000  | 0.000  | 0.000  | 0.000       | 0.103   |  |  |  |  |  |
| Bacteria | Bacteroidetes       | 18.590     | 17.825 | 24.712 | 29.147 | 22.568  | 26.163 | 15.038 | 30.996     | 17.952 | 21.322 | 22.294  | 26.399 | 15.649 | 20.486 | 41.484      | 29.291 | 26.662  | 16.138 | 12.282 | 12.282 | 19.267 | 14.780      | 16.570  |  |  |  |  |  |
| Bacteria | Chloroflexi         | 0.000      | 0.168  | 0.000  | 0.000  | 0.000   | 0.000  | 0.383  | 0.000      | 0.000  | 0.531  | 0.181   | 0.583  | 0.106  | 0.704  | 0.704       | 1.475  | 0.503   | 0.000  | 0.000  | 0.000  | 0.000  | 0.116       |         |  |  |  |  |  |
| Bacteria | Cyanobacteria       | 0.283      | 0.618  | 0.325  | 0.198  | 0.358   | 0.000  | 0.000  | 0.532      | 0.501  | 0.197  | 0.274   | 0.021  | 0.136  | 0.275  | 0.000       | 0.016  | 0.106   | 0.000  | 0.000  | 0.000  | 0.000  | 0.000       | 0.067   |  |  |  |  |  |
| Bacteria | Deltaproteobacteria | 0.116      | 0.061  | 0.000  | 0.017  | 0.048   | 0.029  | 0.000  | 0.000      | 0.000  | 0.342  | 0.094   | 0.109  | 0.098  | 0.136  | 0.097       | 0.000  | 0.088   | 0.000  | 0.000  | 0.000  | 0.000  | 0.000       | 0.284   |  |  |  |  |  |
| Bacteria | Eusimicrobia        | 0.000      | 0.029  | 0.000  | 0.000  | 0.019   | 0.011  | 0.000  | 0.000      | 0.000  | 0.120  | 0.041   | 0.000  | 0.000  | 0.000  | 0.007       | 0.315  | 0.064   | 0.000  | 0.000  | 0.000  | 0.000  | 0.000       | 0.063   |  |  |  |  |  |
| Archaea  | Euryarchaeota       | 0.000      | 0.000  | 0.124  | 0.257  | 0.095   | 0.000  | 0.000  | 0.000      | 0.000  | 0.058  | 0.012   | 0.294  | 0.000  | 0.069  | 0.057       | 0.278  | 0.139   | 0.000  | 0.000  | 0.000  | 0.000  | 0.000       | 0.007   |  |  |  |  |  |
| Bacteria | Firmicutes          | 69.123     | 70.624 | 55.619 | 50.673 | 61.510  | 61.064 | 83.178 | 60.932     | 49.646 | 63.333 | 63.631  | 52.891 | 70.446 | 66.267 | 48.130      | 54.908 | 58.528  | 65.309 | 76.226 | 76.226 | 52.015 | 57.191      | 64.754  |  |  |  |  |  |
| Bacteria | Fusobacteria        | 0.000      | 0.000  | 0.000  | 0.000  | 0.000   | 0.000  | 0.000  | 0.000      | 0.000  | 0.000  | 0.000   | 0.000  | 0.000  | 0.000  | 0.000       | 0.000  | 0.000   | 0.000  | 0.000  | 0.000  | 0.000  | 0.000       | 0.000   |  |  |  |  |  |
| Bacteria | Lentisphaerae       | 0.358      | 0.131  | 0.104  | 0.000  | 0.148   | 1.049  | 0.000  | 0.506      | 0.213  | 0.244  | 0.402   | 0.084  | 0.210  | 0.149  | 0.000       | 0.110  | 0.111   | 0.000  | 0.000  | 0.000  | 0.000  | 0.000       | 0.147   |  |  |  |  |  |
| Bacteria | OD1                 | 0.000      | 0.000  | 0.000  | 0.000  | 0.000   | 0.000  | 0.000  | 0.000      | 0.000  | 0.000  | 0.000   | 0.000  | 0.000  | 0.000  | 0.000       | 0.000  | 0.000   | 0.000  | 0.000  | 0.000  | 0.000  | 0.000       | 0.000   |  |  |  |  |  |
| Bacteria | Planctomycetes      | 0.000      | 0.000  | 0.000  | 0.000  | 0.000   | 0.000  | 0.000  | 0.000      | 0.000  | 0.000  | 0.000   | 0.000  | 0.000  | 0.000  | 0.000       | 0.000  | 0.000   | 0.000  | 0.000  | 0.000  | 0.000  | 0.000       | 0.000   |  |  |  |  |  |
| Bacteria | Proteobacteria      | 1.649      | 0.742  | 2.353  | 1.101  | 1.461   | 0.216  | 0.507  | 1.040      | 2.230  | 2.200  | 1.239   | 3.489  | 0.433  | 1.599  | 1.464       | 0.766  | 1.550   | 0.832  | 0.000  | 0.000  | 0.000  | 0.000       | 0.000   |  |  |  |  |  |
| Bacteria | Spirochaetes        | 1.619      | 0.613  | 1.446  | 2.029  | 1.427   | 0.541  | 0.000  | 0.513      | 0.364  | 0.066  | 0.297   | 2.252  | 1.646  | 1.513  | 1.936       | 2.835  | 2.036   | 0.000  | 0.000  | 0.000  | 0.000  | 0.000       | 0.000   |  |  |  |  |  |
| Bacteria | Synergistetes       | 0.000      | 0.000  | 0.000  | 0.000  | 0.000   | 0.000  | 0.000  | 0.000      | 0.000  | 0.000  | 0.000   | 0.000  | 0.000  | 0.000  | 0.000       | 0.000  | 0.000   | 0.000  | 0.000  | 0.000  | 0.000  | 0.000       | 0.000   |  |  |  |  |  |
| Bacteria | Tenericutes         | 0.000      | 0.086  | 0.233  | 1.485  | 0.451   | 0.053  | 0.000  | 0.000      | 0.000  | 0.109  | 0.032   | 1.413  | 0.299  | 0.179  | 0.114       | 0.115  | 0.424   | 0.000  | 0.000  | 0.000  | 0.000  | 0.000       | 0.000   |  |  |  |  |  |
| Bacteria | TM7                 | 0.231      | 0.646  | 0.603  | 0.789  | 0.567   | 0.000  | 0.000  | 0.000      | 0.000  | 0.761  | 0.152   | 1.135  | 0.983  | 0.315  | 0.528       | 0.667  | 0.526   | 0.644  | 0.373  | 0.000  | 0.000  | 0.000       | 0.036   |  |  |  |  |  |
| Bacteria | Unclassified        | 7.698      | 7.910  | 13.470 | 13.466 | 10.636  | 10.774 | 0.772  | 4.938      | 28.965 | 10.226 | 11.135  | 11.497 | 8.375  | 8.153  | 5.770       | 8.934  | 8.546   | 12.222 | 11.492 | 11.492 | 22.112 | 25.472      | 15.823  |  |  |  |  |  |
| Bacteria | Unclassified        | 0.152      | 0.110  | 0.420  | 0.333  | 0.254   | 0.000  | 0.000  | 0.210      | 0.057  | 0.295  | 0.112   | 0.021  | 0.544  | 0.136  | 0.154       | 0.000  | 0.171   | 0.181  | 0.772  | 0.000  | 0.139  | 0.077       | 0.234   |  |  |  |  |  |
| Bacteria | Verrucomicrobia     | 0.181      | 0.258  | 0.342  | 0.236  | 0.254   | 0.000  | 0.000  | 0.000      | 0.000  | 0.000  | 0.000   | 0.692  | 0.795  | 0.336  | 0.000       | 0.000  | 0.365   | 0.000  | 0.000  | 0.000  | 0.000  | 0.034       | 0.014   |  |  |  |  |  |





**Supplementary Table S3.** Crypt depth and villi height in ileum and colon after FMT

| Crypt depth and villi height in ileum by group ( $\mu\text{m}$ ) |           |        |          |        |          |       |           |        |
|------------------------------------------------------------------|-----------|--------|----------|--------|----------|-------|-----------|--------|
|                                                                  | PBS group |        | PF group |        | WF group |       | AWF group |        |
|                                                                  | mean      | SEM    | mean     | SEM    | mean     | SEM   | mean      | SEM    |
| Villi Height                                                     | 344.250   | 17.115 | 334.333  | 10.793 | 336.200  | 8.861 | 334.333   | 12.426 |
| Crypt Depth                                                      | 217.750   | 7.574  | 221.667  | 12.309 | 223.400  | 7.807 | 224.000   | 10.368 |
| V/C                                                              | 1.649     | 0.111  | 1.662    | 0.111  | 1.603    | 0.073 | 1.580     | 0.087  |

V/C: Villi height/Crypt Depth ratio

| Crypt depth in colon by group ( $\mu\text{m}$ ) |            |       |            |        |          |       |           |        |
|-------------------------------------------------|------------|-------|------------|--------|----------|-------|-----------|--------|
|                                                 | PBS group* |       | PF group * |        | WF group |       | AWF group |        |
|                                                 | mean       | SEM   | mean       | SEM    | mean     | SEM   | mean      | SEM    |
| Crypt Depth                                     | 495        | 7.425 | 466.000    | 14.016 | 489.000  | 6.222 | 474.667   | 13.128 |

\* *P* value (0.01-0.05)

**Supplementary Table S4.** Score for clinical signs recorded throughout the study

| Score | Body condition        |              | Behavior                          | Digestive signs                      | Respiratory signs            | Other signs                                    |
|-------|-----------------------|--------------|-----------------------------------|--------------------------------------|------------------------------|------------------------------------------------|
|       | Vertebra              | Ribs         | Signs                             | Signs                                | Signs                        | Dermatitis, testicular tummeffaction, lameness |
| 0     | Non visible           | Non visible  | Active, alert, plays              | Perianal skin clean                  | Non apparent                 | Non apparent                                   |
| 1     | Visible in the dorsum | Non visible  | Sadness, quite                    | Perianal skin dirty                  | Mild dispnea                 | Mild                                           |
| 2     | Prominent             | Visible      | Mild depression, alert            | Hind limbs dirty                     | Evident dyspnea              | Moderate                                       |
| 3     | Very marked           | Individually | Depression, stillness, postration | Red/blotchy skin lesions in the back | panting, difficult breathing | Severe                                         |



**Supplementary Table S5.** Core taxa list from different sampling times in PF and AWF groups and Venn diagrams representing the shared taxa.

| Groups                       | total | family                     | Genera                  |
|------------------------------|-------|----------------------------|-------------------------|
| PF_0dpft PF_8 dpft PF_15dpft | 4     | <i>Ruminococcaceae</i>     | <i>Clostridium</i>      |
|                              |       | <i>Prevotellaceae</i>      | <i>Prevotella</i>       |
|                              |       | <i>Ruminococcaceae</i>     | <i>Sporobacter</i>      |
|                              |       | <i>Ruminococcaceae</i>     | <i>Papillibacter</i>    |
| PF_0dpft PF_8dpft            | 1     | [ <i>Barnesiellaceae</i> ] | <i>Barnesiella</i>      |
| PF_0dpft PF_15dpft           | 3     | <i>Veillonellaceae</i>     | <i>Succinispira</i>     |
|                              |       | <i>Clostridiaceae</i>      | <i>Clostridium</i>      |
|                              |       | <i>Ruminococcaceae</i>     | <i>Butyricoccus</i>     |
| PF_15dpft PF_8dpft           | 2     | <i>Erysipelotrichaceae</i> | <i>gut</i>              |
|                              |       | <i>Paraprevotellaceae</i>  | <i>Paraprevotella</i>   |
| PF_0dpft                     | 4     | <i>Desulfovibrionaceae</i> | <i>Desulfovibrio</i>    |
|                              |       | <i>Ruminococcaceae</i>     | <i>Bacteroides</i>      |
|                              |       | <i>Lachnospiraceae</i>     | <i>Roseburia</i>        |
|                              |       | <i>Lachnospiraceae</i>     | <i>Ruminococcus</i>     |
| PF_8dpft                     | 1     | <i>Erysipelotrichaceae</i> | <i>Anaerorhabdus</i>    |
| PF_15dpft                    | 7     | <i>Spirochaetaceae</i>     | <i>Treponema</i>        |
|                              |       | <i>Ruminococcaceae</i>     | <i>Faecalibacterium</i> |
|                              |       | <i>Veillonellaceae</i>     | <i>Selenomonas</i>      |
|                              |       | <i>Pasteurellaceae</i>     | <i>Actinobacillus</i>   |
|                              |       | <i>Lachnospiraceae</i>     | <i>Clostridium</i>      |
|                              |       | <i>Campylobacteraceae</i>  | <i>Campylobacter</i>    |
|                              |       | <i>Erysipelotrichaceae</i> | <i>Asteroleplasma</i>   |

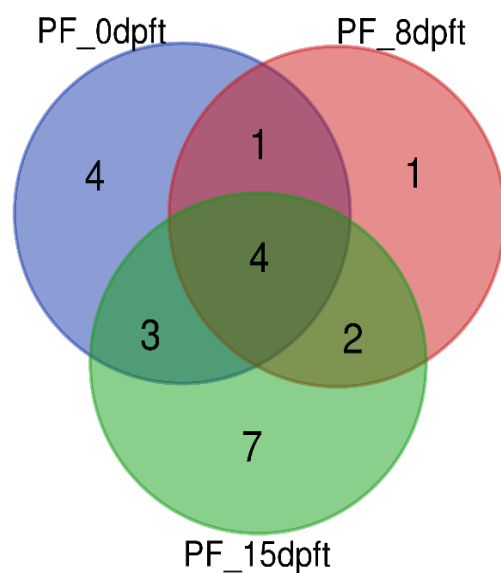

**Supplementary Table S5.** Core taxa list from different sampling times in PF and AWF groups and Venn diagrams representing the shared taxa (cont.).

| Groups                                   | total    | Family                       | Genera                  |
|------------------------------------------|----------|------------------------------|-------------------------|
| <b>AWF_0 dpft AWF_8 dpft AWF_15 dpft</b> | <b>6</b> | <i>Ruminococcaceae</i>       | <i>Clostridium</i>      |
|                                          |          | <i>Prevotellaceae</i>        | <i>Prevotella</i>       |
|                                          |          | <i>[Barnesiellaceae]</i>     | <i>Barnesiella</i>      |
|                                          |          | <i>Erysipelotrichaceae</i>   | <i>gut</i>              |
|                                          |          | <i>Ruminococcaceae</i>       | <i>Sporobacter</i>      |
|                                          |          | <i>Paraprevotellaceae</i>    | <i>Paraprevotella</i>   |
| <b>AWF_0 dpft AWF_8 dpft</b>             | <b>1</b> | <i>Veillonellaceae</i>       | <i>Succinispira</i>     |
| <b>AWF_0 dpft AWF_15 dpft</b>            | <b>3</b> | <i>Erysipelotrichaceae</i>   | <i>Anaerorhabdus</i>    |
|                                          |          | <i>Clostridiaceae</i>        | <i>Clostridium</i>      |
|                                          |          | <i>Ruminococcaceae</i>       | <i>Papillibacter</i>    |
| <b>AWF_8 dpft AWF_15 dpft</b>            | <b>2</b> | <i>Ruminococcaceae</i>       | <i>Faecalibacterium</i> |
|                                          |          | <i>Erysipelotrichaceae</i>   | <i>Asteroleplasma</i>   |
| <b>AWF_0dpft</b>                         | <b>3</b> | <i>Peptostreptococcaceae</i> | <i>Clostridium</i>      |
|                                          |          | <i>Ruminococcaceae</i>       | <i>Butyricoccus</i>     |
|                                          |          | <i>Lachnospiraceae</i>       | <i>Defluviitalea</i>    |
| <b>AWF_8dpft</b>                         | <b>2</b> | <i>Ruminococcaceae</i>       | <i>Gemmiger</i>         |
|                                          |          | <i>Lachnospiraceae</i>       | <i>Clostridium</i>      |
| <b>AWF_15dpft</b>                        | <b>4</b> | <i>Desulfovibrionaceae</i>   | <i>Desulfovibrio</i>    |
|                                          |          | <i>Spirochaetaceae</i>       | <i>Treponema</i>        |
|                                          |          | <i>Veillonellaceae</i>       | <i>Selenomonas</i>      |
|                                          |          | <i>Lachnospiraceae</i>       | <i>Roseburia</i>        |

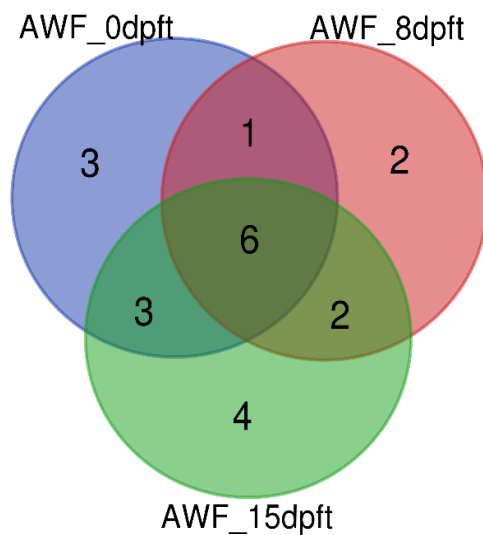

**Supplementary Table S6.** Average haematology parameters in pigs at 4 dpft and 15 dpft.

|                 | 4 dpft |       |       |       | 15 dpft |       |        |       | Reference   |
|-----------------|--------|-------|-------|-------|---------|-------|--------|-------|-------------|
|                 | PBS    | PF    | WF    | AWF   | PBS     | PF    | WF     | AWF   |             |
| WBC<br>(x10E3)  | 21.46  | 22.89 | 24.22 | 23.25 | 24.93*  | 31.8  | 34.12* | 29.8  | 11.0 - 22.0 |
| RBC (x10E6)     | 5.93   | 5.79  | 5.92  | 5.64  | 6.45    | 5.99  | 6.17   | 5.84  | 6.8 -12.9   |
| LYM<br>(x10E3)  | 7.9    | 7.6   | 7.88  | 8.98  | 9.58    | 9.71  | 10.36  | 10.75 | 4.3 - 13.0  |
| % LYM           | 43.27  | 40.1  | 37.25 | 39.88 | 40.91   | 33.41 | 34.53  | 37    |             |
| MONO<br>(x10E3) | 0.73   | 0.84  | 0.98  | 0.88  | 1.09    | 1.22  | 0.95   | 0.92  | 0.2 - 2.2   |
| % MONO          | 3.7    | 3.84  | 4.54  | 3.93  | 4.54    | 3.83  | 3.13   | 3.15  |             |
| EOS (x10E3)     | 0.7    | 0.28  | 0.36  | 0.31  | 0.5     | 0.59  | 0.6    | 0.51  | 0.05 - 2.4  |
| % EOS           | 3.88   | 1.38  | 1.48  | 1.34  | 2.06    | 1.93  | 1.78   | 1.76  |             |
| NEU (x10E3)     | 11.91  | 13.93 | 14.84 | 12.82 | 13.52*  | 20.06 | 22.00* | 17.38 | 3.1 - 10.5  |
| %NEU            | 48.14  | 53.48 | 56    | 53.68 | 51.47   | 60    | 59.85  | 57.26 |             |
| BASO<br>(x10E3) | 0.04   | 0.05  | 0.04  | 0.05  | 0.07    | 0.06  | 0.06   | 0.05  |             |
| % BASO          | 0.22   | 0.22  | 0.19  | 0.21  | 0.28    | 0.21  | 0.21   | 0.17  |             |

\**P* value < 0.05

PBS: non-transplanted group; PF: pig feces group; WF: warthog feces group; AWF: antibiotic + warthog feces group.
